# Supplementary material for: Efficacy and safety of fixed-dose combinations of aclidinium bromide/formoterol fumarate: the 24-week, randomized, placebo-controlled AUGMENT COPD study
Source: Springer Nature journal article supplement (doi:10.1186/s12931-014-0123-0), 2014-10-13

## Supplemental Data

**Table.** Schedule of evaluations

| Evaluation                                        | Run-in               | Double-Blind Treatment |                  |                   |                    |                    |                    |             |
|---------------------------------------------------|----------------------|------------------------|------------------|-------------------|--------------------|--------------------|--------------------|-------------|
|                                                   | Visit 1<br>Screening | Visit 2<br>Day 1       | Visit 3<br>Day 4 | Visit 4<br>Week 4 | Visit 5<br>Week 12 | Visit 6<br>Week 18 | Visit 7<br>Week 24 | ET<br>Visit |
| Predose PFT <sup>a</sup>                          |                      | X                      | X                | X                 | X                  | X                  | X                  | X           |
| Postdose PFT <sup>b</sup>                         |                      | X                      | X                | X                 | X                  |                    | X                  | X           |
| BDI/TDI <sup>a</sup>                              |                      | X                      |                  | X                 | X                  |                    | X                  |             |
| SGRQ                                              |                      | X                      |                  | X                 | X                  |                    | X                  | X           |
| EXACT <sup>c</sup>                                | X                    | X                      | X                | X                 | X                  | X                  | X                  | X           |
| EMSCI <sup>c</sup>                                | X                    | X                      | X                | X                 | X                  | X                  | X                  | X           |
| NiSCI <sup>c</sup>                                | X                    | X                      | X                | X                 | X                  | X                  | X                  | X           |
| 12-hour PFT<br>(spirometry substudy) <sup>d</sup> |                      | X                      |                  |                   | X                  |                    | X                  |             |
| Rescue medication use <sup>e</sup>                | X                    | X                      | X                | X                 | X                  | X                  | X                  | X           |
| Adverse events                                    | X                    | X                      | X                | X                 | X                  | X                  | X                  | X           |
| Vital signs <sup>c</sup>                          | X                    | X                      | X                | X                 | X                  | X                  | X                  | X           |
| 12-lead ECG <sup>d</sup>                          | X                    | X                      | X                | X                 | X                  |                    | X                  | X           |
| Laboratory tests (fasting)                        | X                    |                        |                  |                   | X                  |                    | X                  | X           |

<sup>a</sup>IC conducted before forced maneuvers. FEV<sub>1</sub> and FVC performed at 1 hour and 10 minutes predose except at ET (only once if patient was able to complete the tests).

<sup>b</sup>FEV<sub>1</sub> and FVC performed at 30 minutes, 1 hour, and 2.25 hours postdose. At Visit 2, an additional evaluation was taken at 5 minutes post-dose.

<sup>a</sup>BDI/TDI was always completed before the SGRQ. BDI was performed at Visit 2 (predose); TDI was performed at subsequent visits.

<sup>b</sup>Recorded twice-daily (morning and evening) in the patient electronic diary.

<sup>c</sup>Blood pressure and heart rate readings taken after patient had been sitting for 10 minutes. Body weight was evaluated at Visit 1 and Visit 7/ET.

<sup>d</sup>Performed in approximately 20% of patients at selected sites. FEV<sub>1</sub> and FVC evaluated at 4, 6, 8, 10, and 12 hours post- morning dose. IC only performed at 12 hours post-morning dose.

<sup>d</sup>ECG performed pre-dose and 2 hours post-dose except at Visit 1 (once for eligibility only) and at ET Visit (once).

BDI, Baseline Dyspnea Index; ECG, electrocardiogram; ET, early termination; EMSCI, Early Morning Symptoms of COPD Instrument; EXACT, Exacerbation of Chronic Pulmonary Disease Tool; FEV, forced expiratory volume in 1 second; FVC, forced vital capacity; NiSCI, Nighttime Symptoms of COPD Instrument; PFT, pulmonary function test; SGRQ, St. George's Respiratory Questionnaire; TDI, Transition Dyspnea Index.

**Figure.** Change from baseline in FEV<sub>1</sub> by timepoint at week 24. This analysis was conducted in a subset of patients from the ITT population who participated in the 12-hour serial spirometry substudy. ACL400/FOR12 FDC, fixed-dose combination of acclidinium 400 µg and formoterol 12 µg; ACL400/FOR6 FDC, fixed-dose combination of 400 µg and formoterol 6 µg; FEV<sub>1</sub>, forced expiratory volume in 1 second; ITT, intention-to-treat; LS, least square

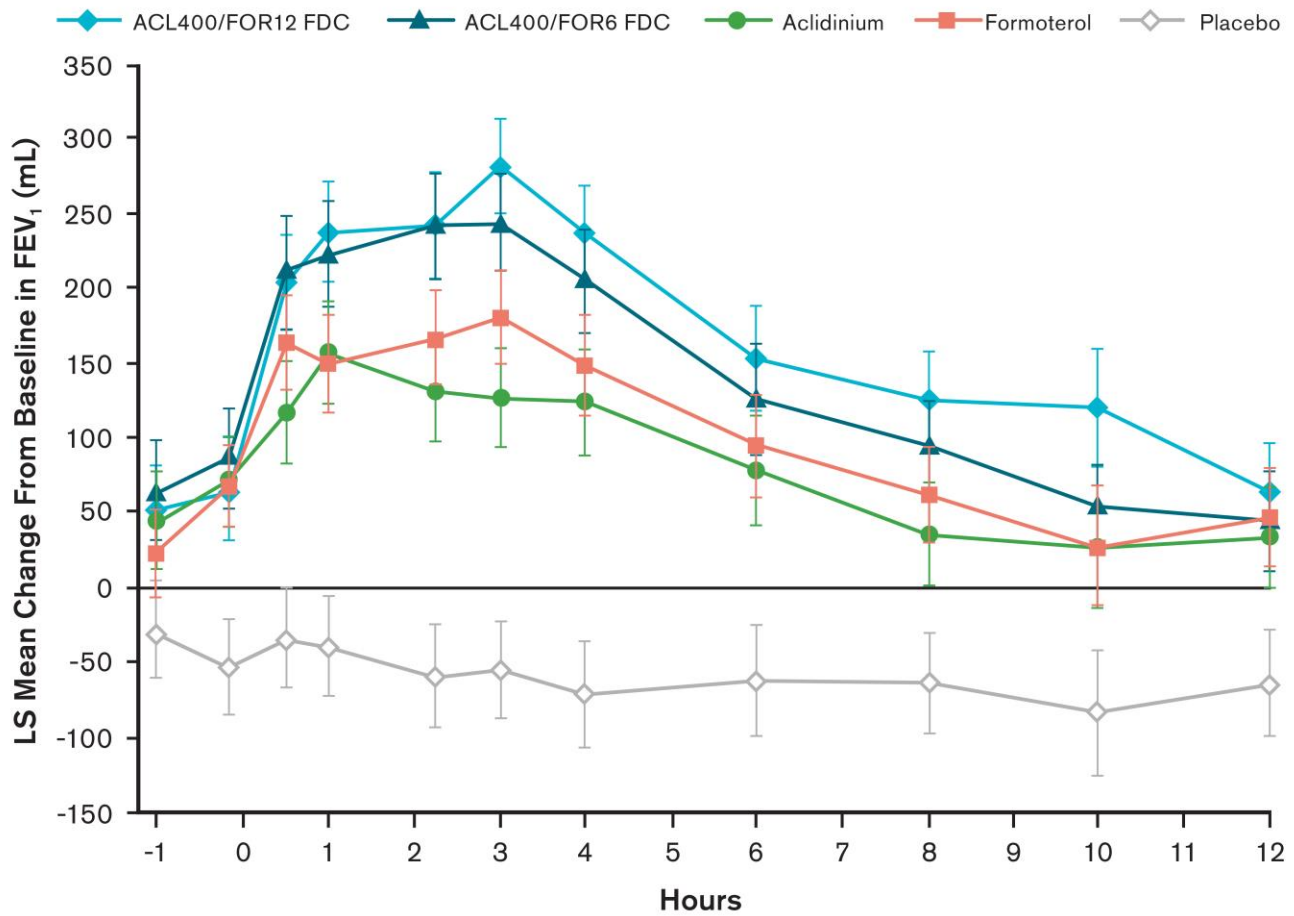

Supplement: MOESM1 [file 9759486]
